# Supplementary material for: Unveiling the circRNA-Mediated Immune Responses of Western Honey Bee Larvae to Ascosphaera apis Invasion
Source: MDPI journal article supplement (doi:10.3390/ijms24010613), 2022-12-29
Supplement: s1 [file s1]

Table S1 Summary of mapping of anchors reads to the reference genome of *A. mellifera*

| sample | anchors reads | anchors reads mapped in reference genome | map rate (%) |
|--------|---------------|------------------------------------------|--------------|
| AmCK1  | 7 471 892     | 3 160 593                                | 42.30        |
| AmCK2  | 6 905 870     | 3 734 903                                | 54.08        |
| AmCK3  | 8 328 540     | 4 154 993                                | 49.89        |
| AmT1   | 7 893 288     | 3 862 442                                | 48.93        |
| AmT2   | 7 350 996     | 3 826 332                                | 52.05        |
| AmT3   | 5 845 700     | 3 040 217                                | 52.01        |

Table S2 Summary of target mRNAs involved in immune pathways

| Pathways                    | AmCK1 vs AmT1<br>comparison group | AmCK2 vs AmT2<br>comparison group | AmCK3 vs AmT3<br>comparison group |
|-----------------------------|-----------------------------------|-----------------------------------|-----------------------------------|
| Lysosome                    | 1                                 | 2                                 | 0                                 |
| Endocytosis                 | 1                                 | 0                                 | 1                                 |
| Phagosome                   | 0                                 | 1                                 | 1                                 |
| Autophagy                   | 0                                 | 0                                 | 1                                 |
| Apoptosis                   | 0                                 | 0                                 | 2                                 |
| MAPK signal pathway         | 2                                 | 2                                 | 1                                 |
| Jak-STAT signal pathway     | 0                                 | 1                                 | 1                                 |
| Toll and Imd signal pathway | 0                                 | 0                                 | 1                                 |

Table S3 Detailed information of primers used in this work

| Name                | Sequence (5'-3')            |
|---------------------|-----------------------------|
| novel_circ_000007-F | CGAGGTCAAACGTGTGTCCCGTA     |
| novel_circ_000007-R | TCCACCAGGTCCAACCGAACT       |
| novel_circ_001116-F | AATTGACCGATGCTTACGAGGC      |
| novel_circ_001116-R | TTTGTTCCTCGCCCACTTTGC       |
| novel_circ_001620-F | ACACTCCAGCTGGGTAAAGCTAGATTA |
| novel_circ_001620-R | TTTGTTCCTCGCCCACTTTGC       |
| novel_circ_000465-F | CCATCAACACGGGAACCACA        |
| novel_circ_000465-R | GGCTGAACTTCCCTCGTGTC        |
| novel_circ_000474-F | GCATAGTCAGCACCACCAGT        |
| novel_circ_000474-R | GCTGCCTTGGCTGGATGATA        |
| novel_circ_001617-F | GAAATCGCGGTCACATTGGC        |

---

|                     |                          |
|---------------------|--------------------------|
| novel_circ_001617-R | CGTCAAAGTGAATGCAGTGGG    |
| novel_circ_000573-F | AGGATTCGCCGCTCGTCATTG    |
| novel_circ_000573-R | GTGCCATCTCGCTGGACATCTC   |
| novel_circ_000264-F | GCGAAGCAAAGGACGACGAGTC   |
| novel_circ_000264-R | TGGAAGGAACGATGGTGAGGATGA |
| novel_circ_000653-F | AGACGTGACCGACTCGAAGGA    |
| novel_circ_000653-R | GAACGGCAGACGGTGATCCAA    |
| novel_circ_000400-F | CCTGGTACTCGTGTTCTCCG     |
| novel_circ_000400-R | CCTCGATCTTCCCACCATCG     |
| novel_circ_001048-F | CTCGAGGATGATGTCATTGATCT  |
| novel_circ_001048-R | GGGAGCTTACCATCCTTCGT     |
| novel_circ_001377-F | GGACGAAGAGACAGTTCCACA    |
| novel_circ_001377-R | GGTGGCTCAGGATCGGTAGA     |
| novel_circ_000408-F | AGATTCAGCCAGCATCGTCACA   |
| novel_circ_000408-R | TCCTCCTCCTCCTCCTCCTGTT   |
| novel_circ_000465-F | CCATCAACACGGGAACCACA     |
| novel_circ_000465-R | GGCTGAACTTCCCTCGTGTC     |
| novel_circ_000573-F | AGGATTCGCCGCTCGTCATTG    |
| novel_circ_000573-R | GTGCCATCTCGCTGGACATCTC   |
| novel_circ_000846-F | AAGACTTCCGCTTCCGAACCAA   |
| novel_circ_000846-R | TCTCTTTCCAACCTCGCCGCTAA  |
| novel_circ_000922-F | CGGCCATCAGATTCAGCAGCA    |
| novel_circ_000922-R | TGCGTGCATTGCAGCTTCAC     |
| novel_circ_001116-F | AATTGACCGATGCTTACGAGGC   |
| novel_circ_001116-R | TTTGTTCCCGCCCACCTTGC     |
| novel_circ_001374-F | AACGAGGACAAGGAAGAT       |
| novel_circ_001374-R | ATTGATCCGACAGTGATT       |
| novel_circ_001556-F | CGATGTCGTTGGAGCAGGAAGT   |
| novel_circ_001556-R | GCGGACGTTGGTGTCGTTGAA    |

---

---

|                     |                        |
|---------------------|------------------------|
| novel_circ_001620-F | TCAGACAAGAGCCGCAGCATTC |
| novel_circ_001620-R | CGGACGACGGTGAGAGATGGAA |
| novel_circ_000774-F | AGAATGTCGACTTGCACCGA   |
| novel_circ_000774-R | GTGTGGGAAGAGGAGCAGTC   |
| novel_circ_000344-F | CGCCCAGTCCAGTTATCGTT   |
| novel_circ_000344-R | GTGGCTCCGAGATCAACACA   |
| novel_circ_001194-F | TATGAGCACCAGCAGCTACG   |
| novel_circ_001194-R | AGGGACTTCCTCTACCGCAT   |
| <i>actin</i> -F     | CACTCCTGCTATGTATGTCGC  |
| <i>actin</i> -R     | GGCAAAGCGTATCCTTCA     |

---
